# Supplementary material for: Restoring South African subtropical succulent thicket using Portulacaria afra: root growth of cuttings differs depending on the harvest site during a drought
Source: PeerJ. 2024 Jun 28;12:e17471. doi: 10.7717/peerj.17471 (PMC11216190; doi:10.7717/peerj.17471)
Supplement: Supplemental Information 2 — Significant differences within sampling events amongst source populations are shown using dissimilar superscripts (tests for significant differences were conducted using Kruskal–Wallis and post-hoc Dunn tests across populations for each harvest week). [file peerj-12-17471-s002.docx]

|  | Percentage Rooted Cuttings (%) Across Sites | | | | | | | | | |  |
| --- | --- | --- | --- | --- | --- | --- | --- | --- | --- | --- | --- |
| Sampling event | 1 | 2 | 3 | 4 | 5 | 6 | 7 | 8 | 9 | 10 | Kruskal-Wallis Test |
| 20 | 47±14ab | 67±26ab | 20±18ab | 10±15a | 17±19ab | 91±13b | 17±17ab | 13±14a | 83±20ab | 93±9b | 𝝌2(9)=38.0, p<0.0001 |
| 27 | 73±15abc | 97±7ab | 43±25ac | 27±19c | 54±16abc | 100±0b | 60±25abc | 53±22abc | 87±14abc | 100±0b | 𝝌2(9)=36.8, p<0.0001 |
| 35 | 78±16abc | 97±7ab | 55±39abc | 31±30c | 76±21abc | 100±0a | 72±26abc | 45±21bc | 96±9abc | 97±7ab | 𝝌2(9)=30.9, p<0.001 |
| 42 | 90±9ab | 93±9ab | 67±42ab | 43±25a | 83±14ab | 100±0b | 90±9ab | 67±31ab | 100±0b | 100±0b | 𝝌2(9)=27.2, p=0.001 |
| 48 | 97±7a | 97±7a | 63±32a | 50±33a | 79±25a | 100±0a | 93±15a | 63±30a | 93±15a | 100±0a | 𝝌2(9)=25.9, p=0.002 |
| 56 | 100±0a | 100±0a | 70±34ab | 60±35b | 96±8ab | 100±0a | 100±0a | 67±26ab | 90±22ab | 100±0a | 𝝌2(9)=29.7, p<0.001 |
| 103 | 93±15ab | 100±0a | 67±39ab | 73±35ab | 88±25ab | 100±0a | 97±7ab | 57±19b | 93±15ab | 100±0a | 𝝌2(9)=25.1, p=0.003 |
